## Original Article

# Assessing Post-TAVR Cardiac Conduction Abnormalities Risk Using a Digital Twin of a Beating Heart

### **Author information:**

Symon Reza<sup>1</sup>, Brandon Kovarovic<sup>1</sup>, and Danny Bluestein<sup>1</sup>

<sup>1</sup>Department of Biomedical Engineering, Stony Brook University, Stony Brook, New York, USA

### **Acknowledgement**

SIMULIA Living Heart Project has provided the base framework of 4-chamber beating heart model employed in this study. The authors thank Dr. Matteo Bianchi for initiating the project and providing scientific insights.

### **Funding Source**

This project is funded by NIH-NIBIB BRP U01EB026414 (DB)

### **\*Corresponding author:**

Prof. Danny Bluestein

Department of Biomedical Engineering

Stony Brook University

Stony Brook, NY 11794-8084, USA

Tel: +1 (631) 444-2156

ORCID: 0000-0002-4014-2308

E-mail: [danny.bluestein@stonybrook.edu](mailto:danny.bluestein@stonybrook.edu)

## 1 **Abstract**

2 Transcatheter aortic valve replacement (TAVR) has rapidly displaced surgical aortic valve replacement  
3 (SAVR). However, certain post-TAVR complications persist, with cardiac conduction abnormalities  
4 (CCA) being one of the major ones. The elevated pressure exerted by the TAVR stent onto the conduction  
5 fibers situated between the aortic annulus and the His bundle, in proximity to the atrioventricular (AV)  
6 node, may disrupt the cardiac conduction leading to the emergence of CCA. In his study, an *in-silico*  
7 framework was developed to assess the CCA risk, incorporating the effect of a dynamic beating heart and  
8 pre-procedural parameters such as implantation depth and preexisting cardiac asynchrony in the new onset  
9 of post-TAVR CCA. A self-expandable TAVR device deployment was simulated inside an electro-  
10 mechanically coupled beating heart model in five patient scenarios, including three implantation depths,  
11 and two preexisting cardiac asynchronies: (i) a right bundle branch block (RBBB) and (ii) a left bundle  
12 branch block (LBBB). Subsequently, several biomechanical parameters were analyzed to assess the post-  
13 TAVR CCA risk. The results manifested a lower cumulative contact pressure on the conduction fibers  
14 following TAVR for aortic deployment (0.018 MPa) compared to baseline (0.29 MPa) and ventricular  
15 deployment (0.52 MPa). Notably, the preexisting RBBB demonstrated a higher cumulative contact pressure  
16 (0.34 MPa) compared to the baseline and preexisting LBBB (0.25 MPa). Deeper implantation and  
17 preexisting RBBB cause higher stresses and contact pressure on the conduction fibers leading to an  
18 increased risk of post-TAVR CCA. Conversely, implantation above the MS landmark and preexisting  
19 LBBB reduces the risk.

## 20 **Keywords**

21 TAVR, FEA, CCA, conduction abnormality, PPI, Living Heart Model

## **Statements and Declarations**

Author D.B. has an equity interest in Polynova Cardiovascular Inc. Author B.K. is a consultant for Polynova Cardiovascular Inc. The other authors declare that they have no competing interests.

## 22 **Acronyms**

|      |                                        |
|------|----------------------------------------|
| TAVR | Transcatheter aortic valve replacement |
| CCA  | Cardiac conduction abnormality         |
| MS   | Membranous septum                      |
| PPI  | Permanent pacemaker implantation       |
| A-V  | Atrioventricular                       |
| AOI  | Area of interest                       |
| HB   | His bundle                             |
| CPI  | Contact pressure index                 |
| CTA  | Computed tomography angiography        |
| LBBB | Left bundle branch block               |
| RBBB | Right bundle branch block              |
| RCL  | Right coronary leaflet                 |
| NCL  | Non-coronary leaflet                   |
| LCL  | Left coronary leaflet                  |

## 23 **1. Introduction**

24 The minimally invasive TAVR holds great promise to replace surgical aortic valve  
25 replacement (SAVR) as the gold standard for treating aortic valve stenosis. However, TAVR is  
26 still associated with certain post-procedural complications such as paravalvular leakage,  
27 thrombosis, cardiac conduction abnormalities (CCAs), and structural valve degeneration that  
28 hampers the potential of TAVR to safely extend its use to younger and lower risk patients. Among  
29 these post-procedural complications, CCA remains notably persistent, frequently requiring the

30 implantation of a permanent pacemaker (PPI) (Alperi et al. 2021). Recent studies have indicated  
31 that PPI is associated with increased mortality rate and heart failure hospitalization (Faroux et al.  
32 2020; Jørgensen et al. 2019). Predicting the risk of CCA therefore holds the potential to aid the  
33 clinicians in refining their preprocedural planning strategies leading to better clinical outcomes for  
34 TAVR patients.

35 The interplay between the electrical and biomechanical properties of the beating heart is vital  
36 for its normal functioning. Modifications to the structural dynamics, such as changes in cardiac  
37 preload and afterload, can impact the sinus rhythm through stretching of the sino-atrial node,  
38 contractility through stretching of the atrial and ventricular myocardium (the Frank-Starling  
39 effect), and the distribution of the action potential (Quinn and Kohl 2016). Experimental studies  
40 involving the expansion of chamber lumen, both in-situ and in isolated intact hearts, have provided  
41 evidence of arrhythmias induced by mechanical factors in different species including rats (Kim,  
42 White, and Saint 2012), rabbit (Franz et al. 1992), sheep (Chen et al. 2004), and humans (Levine  
43 et al. 1988). There is compelling evidence indicating that stretching on the myocardium can act as  
44 a significant contributor to mechanically induced arrhythmias. Purkinje fibers (PFs), located in the  
45 endocardial surface of the ventricles are also stretched during lumen expansion (Canale et al.  
46 1983). Consequently, the mechanical activation of PFs presents another plausible factor in the  
47 development of mechanically induced arrhythmias, in addition to the activation of the myocardium  
48 (Ferrier 1976; Reynolds, Chiz, and Tanikella 1975; Thakur et al. 1996). A recent study has  
49 demonstrated evidence supporting the role of PFs in conduction delay (increased R-R interval) in  
50 the hearts of rats and sheep, using targeted PF experiments (Hurley et al. 2023). In the human  
51 heart, the His bundle, positioned below the membranous septum, between the right and non-  
52 coronary cusp, may interact with the TAVR device stent. Considering the location of the TAVR

53 anchorage zone and the nature of the conduction abnormalities observed post-TAVR, it is believed  
54 that these abnormalities are caused by the mechanical stresses exerted on the His bundle.

55 Several clinical studies have been conducted to identify the risk factors and improve pre-  
56 procedure planning of TAVR by determining the likelihood of post-TAVR conduction  
57 abnormalities (CCA) (Boonyakiatwattana et al. 2022; Breitbart et al. 2021; Hamdan et al. 2015;  
58 Mauri et al. 2016; Fujita et al. 2016; Maeno et al. 2017; Pollari et al. 2019; Schaefer et al. 2018;  
59 Oestreich et al. 2018; Tretter et al. 2019; Miyashita et al. 2023; Ravaux et al. 2021; Zheng et al.  
60 2023). Clinical studies have revealed associations between post-TAVR CCA and preexisting right  
61 bundle branch block (RBBB) (Fujita et al. 2016; Hamdan et al. 2015; Maeno et al. 2017; Mauri et  
62 al. 2016; Oestreich et al. 2018; Pollari et al. 2019; Schaefer et al. 2018), deeper implantation (Fujita  
63 et al. 2016; Hamdan et al. 2015; Maeno et al. 2017; Mauri et al. 2016; Oestreich et al. 2018),  
64 shorter membranous septum length and lower  $\Delta$ MSID (subtraction of implantation depth from the  
65 length of membranous septum ) (Hamdan et al. 2015; Maeno et al. 2017; Oestreich et al. 2018).  
66 However, due to complex anatomical features in the device landing zone, accurately assessing the  
67 risk of CCA solely based on anatomical and procedural parameters is challenging, as post-TAVR  
68 CCA depends on the local dynamic interaction between the TAVR prosthesis and conduction  
69 fibers. Therefore, additional patient-specific computational modeling may provide more accurate  
70 predictions of patient specific CCA risk. Recently, computational studies on patient-specific  
71 structural models have indicated that elevated contact pressure and contact pressure index (CPI)  
72 on the His bundle region in the intraventricular septum below the triangular space between the  
73 RCL and NCL for self-expandable TAVR cases (Rocatello et al. 2018) and high area-weighted  
74 average logarithmic strain (AMPLS) and Contact force for balloon expandable TAVR cases were  
75 associated with onset of CCA following TAVR procedure (Reza et al. 2022). To gain more insight

76 into the mechanisms underlying post-TAVR CCA development and provide a more accurate  
77 assessment of CCA risk, it is essential to analyze the interaction between the TAVR prosthesis and  
78 conduction fibers within a realistic, electromechanically coupled, beating heart condition.  
79 Moreover, incorporating preexisting electromechanical asynchronies into electromechanically  
80 coupled beating heart simulations will enable a comprehensive evaluation of CCA risk. However,  
81 current simulations do not consider the impact of the structural dynamics of the beating heart and  
82 pre-existing cardiac asynchrony, which is a significant contributor to new onset of CCA after  
83 TAVR.

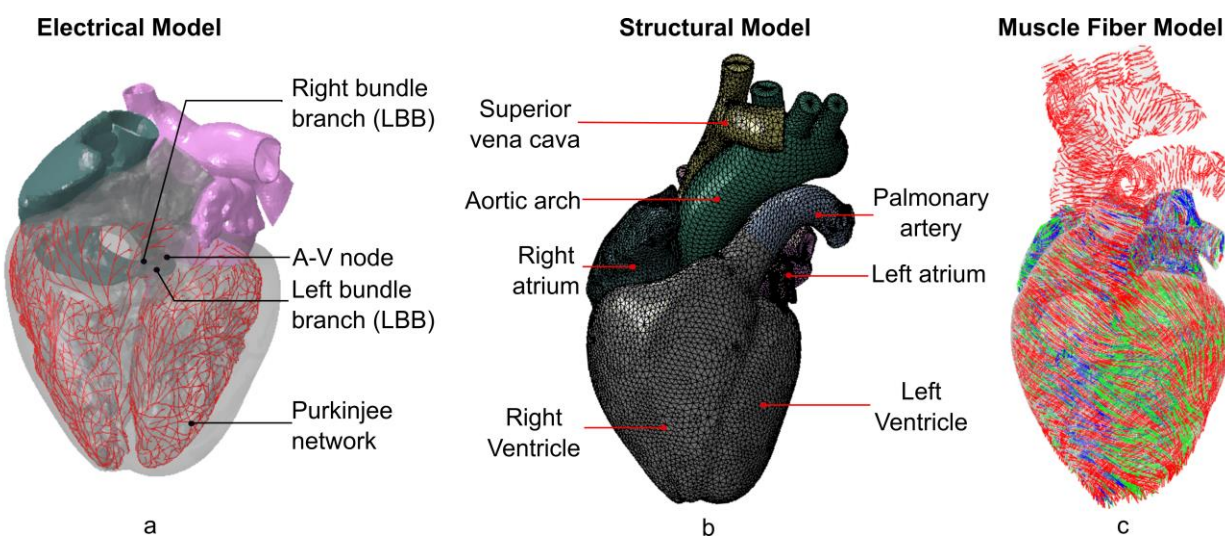

**Figure 1:** Illustration of the (a) electrical model, (b) finite element model, and (c) muscle fiber model of the 4-chamber full heart model (Adopted from SIMULIA Living Heart Human Model User Guide 2018)

84 Among post-TAVR CCAs, new onset of perioperative left bundle branch block (NOP-LBBB)  
85 associated with self-expandable TAVR devices is the major concern (13-37%) (Regueiro et al.  
86 2016). Some TAVR patients developing perioperative NOP-LBBB following TAVR may recover  
87 through cardiac remodeling and may not require PPI, whereas some patients develop delayed high  
88 degree atrioventricular (AV) block (Maille et al. 2022) which makes it challenging for clinicians  
89 to decide whether PPI is required for the patient or not and often leads to unnecessary PPI or

90 prolonged hospital stay. The existing computational techniques that use static patient models can  
91 only predict the risk or perioperative risk of CCA. An electromechanically coupled computational  
92 modeling technique, on the other hand, can potentially play an important role in assessing  
93 perioperative and post-operative risk of developing new conduction disturbances following  
94 TAVR; hence, avoid unnecessary PPI and at the same time, keep the patient safe from further  
95 CCA-related complications.

96 A dynamic high-fidelity Multiphysics model of a four-chamber adult male human heart  
97 (**Figure 1**) (Baillargeon et al. 2014), developed under the SIMULIA Living Heart Project (Dassault  
98 Systèmes, SIMULIA Corp.) has previously been used to study various cardiovascular diseases  
99 (Wisneski et al. 2020; St Pierre, Peirlinck, and Kuhl 2022) including heart failure (Genet et al.  
100 2016; Costabal, Choy, et al. 2019), arrhythmia (Sahli Costabal, Yao, and Kuhl 2018), effects of  
101 drug on treating these diseases (Costabal, Matsuno, et al. 2019), and performance analysis of  
102 several cardiovascular procedures including TAVR (Ghosh et al. 2020b), mitral valve repair  
103 (Galili, White Zeira, and Marom 2022; Heidari et al. 2022; Pasta et al. 2022), and left ventricular  
104 assistance device (Pasta et al. 2022). In this study, this digital twin of the human heart was used to  
105 explore the interaction between the TAVR prosthesis and the conduction fibers both during the  
106 TAVR procedure and across three cardiac cycles subsequent to the procedure, in order to gain  
107 deeper insights into the mechanisms underlying the development of new conduction abnormalities  
108 at varying implantation depths and in the presence of pre-existing CCAs. This investigation holds  
109 the potential to offer valuable insights into predicting the likelihood of persistent CCA and the  
110 potential necessity for PPI due to complete AV block.

## 111 2. Methods

112 A dynamic high-fidelity Multiphysics model of a four-chamber adult male human heart  
113 (Baillargeon et al. 2014), developed under the SIMULIA Living Heart Project was used as the  
114 base model for this study. This model uses a sequentially coupled electro-mechanical  
115 computational technique to simulate realistic cardiac cycles. In this study, we performed  
116 electrophysiological simulations of three different electrophysiological scenarios including  
117 healthy cardiac conduction, RBBB, and LBBB (**Figure 2**). Results obtained from the  
118 electrophysiological simulations were then coupled with the structural heart model to simulate the  
119 mechanical behavior (**Figure 3**). Simultaneously, a Evolut® 26 mm TAVR device (Medtronic,  
120 Inc., Minneapolis, MN) was deployed (**Figure 4a-g**) in a dynamic heart to assess the risk of cardiac  
121 conduction abnormality following TAVR. The recommended implantation depth (ID) for Evolut®  
122 26 mm device is 3-6 mm. In this study, 6 mm implantation depth and normal cardiac conduction  
123 scenario were considered as the baseline. Additionally, two more implantation depths were  
124 investigated: one at 4 mm (2 mm towards the aortic side from baseline) and another at 8 mm (2  
125 mm towards the ventricular side from baseline) in order to comprehend the effect of implantation  
126 depth in developing new conduction disturbance (**Figure 4h**). The MS length of the living heart  
127 model was 5.5 mm, yielding -1.5, +0.5, and +2.5  $\Delta$ MSID for the aortic, baseline, and ventricular  
128 implantation, respectively.

### 129 2.1. Modeling cardiac electrophysiology

130 The Heat Transfer procedure in Abaqus/Standard is used to mimic cardiac conduction of the  
131 Living Heart Model, as the equations for diffusion heat transfer can serve as a proxy to electrical  
132 conduction equations. The electrical analysis in the cardiac cycle begins at the point of 70%



133 ventricular diastole, prior to the atrial systole, and runs for 500 ms from the onset of depolarization  
134 to the end of repolarization across the entire heart. The temperature representing electrical potential  
135 is acquired from the simulation result which is used as a boundary condition to excite the tissue in  
136 the mechanical analysis. A bidomain model is utilized to simulate the conduction of electrical  
137 impulses through the heart, where the action potential travels through the network of Purkinje  
138 fibers and the cardiac muscles. An electrical impulse originates at the sinoatrial node (SA node)  
139 and spreads through the atrial tissue, causing atrial contraction. Sequentially, the electrical impulse  
140 is generated at the atrioventricular node (AV node) and is transmitted to the ventricles of the heart  
141 through the bundle of His. A representative geometry for the bundle of His and Purkinje fibers  
142 (Costabal, Hurtado, and Kuhl 2016) was used to conduct impulses more rapidly compared to the  
143 surrounding heart tissue. This structure is modeled as 1-dimensional electrical elements (DC1D2)  
144 with uniform conductivity, as outlined in Kotikanyadanam et al.(Kotikanyadanam, Göktepe, and  
145 Kuhl 2010). The network was connected to the heart muscle at the end of the network branches,  
146 where individual one-dimensional electrical conduction (DC1D2) elements that resemble  
147 "resistors" are defined (Bordas et al. 2012).

148 The electrical response of the tissue is characterized by an action potential,  $\phi$ , and recovery  
149 variable,  $r$ . The action potential and recovery variable are described by Hurtado and Kuhl (Hurtado  
150 and Kuhl 2014).

151 The global electrical analysis assumes a monodomain response:

$$152 \quad \phi' + \text{div}(q(\phi)) = f \phi(\phi, r)$$

153 where the flux term,  $q$ , characterizes the propagating nature of the electrical waves:

$$154 \quad q = -D \nabla \phi$$

155 The term  $D$  is a second-order diffusion tensor, which can account for anisotropic diffusion. The

156 source term,  $f^\phi$ , characterizes the local action potential profile:

157

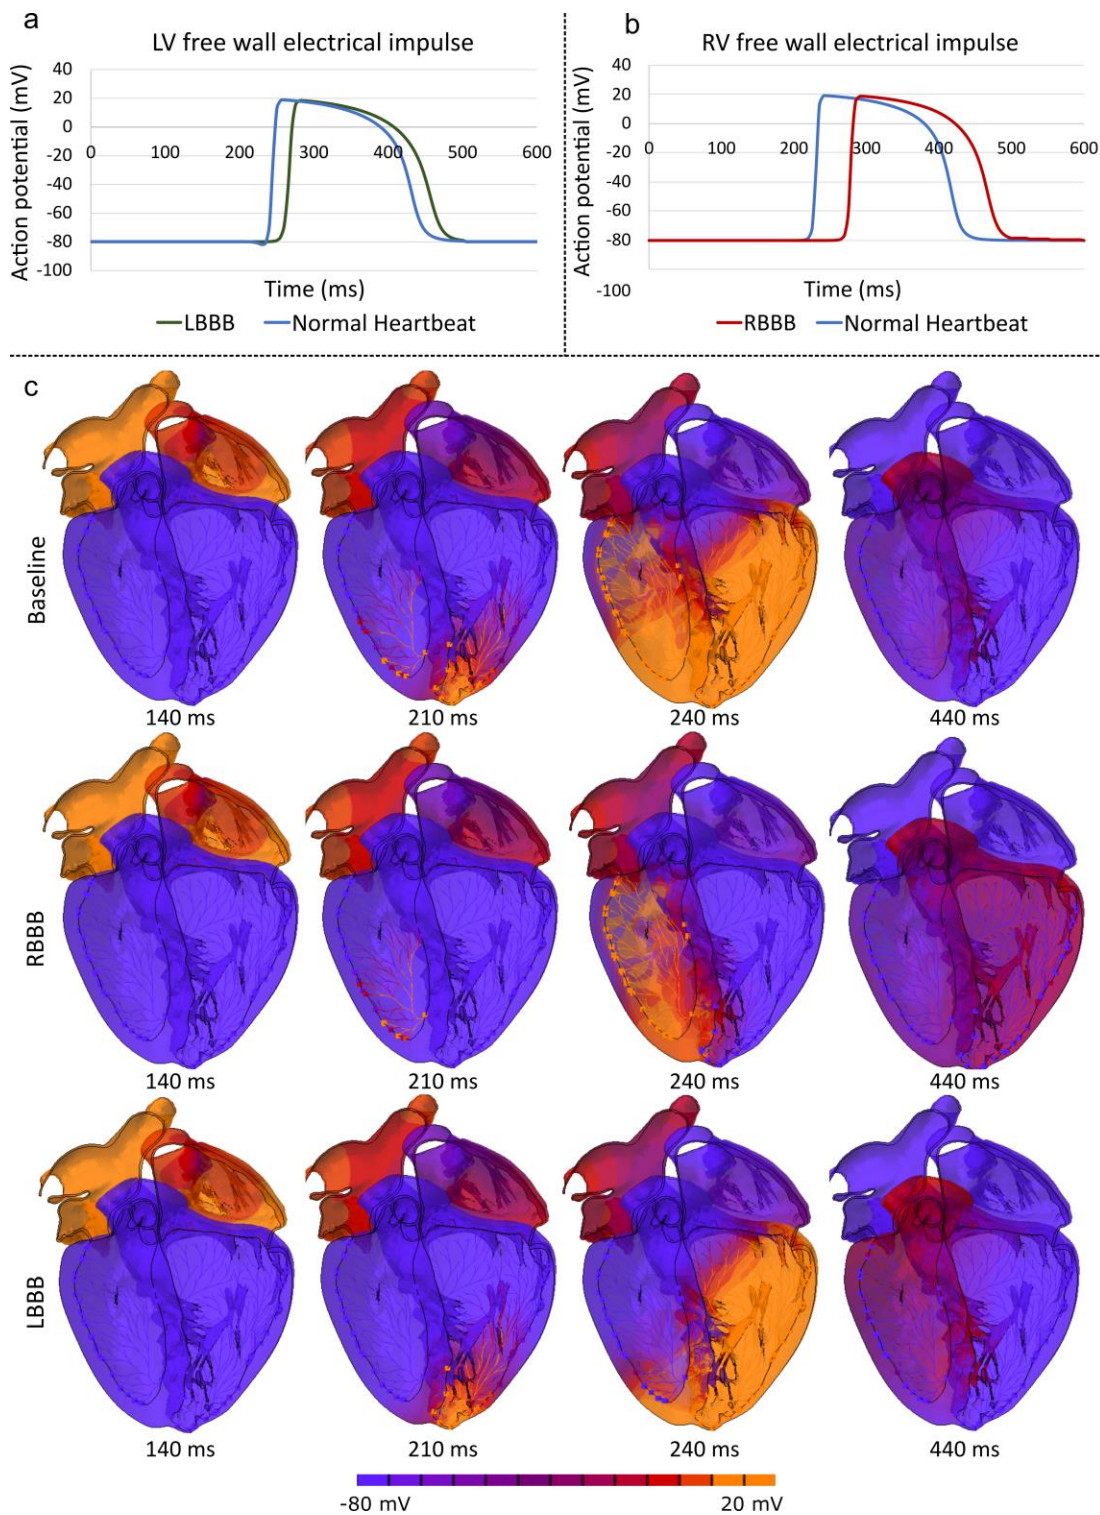

**Figure 2:** Conduction delay on the (a) left ventricular free wall due to LBBB, and (b) left ventricular free wall due to RBBB. (c) Distribution of electrical impulse at four timesteps during electrical depolarization for baseline (top row), RBBB (middle row), and LBBB (bottom row) cases.

158 The local biochemical portion of the analysis is modeled through a temporal evolution of the  
159 recovery variable,  $r$ .

160 The electrical properties are calibrated to provide physiologically observed activation times.  
161 The bundle of His and Purkinje fibers are assigned conduction parameters that generate the  
162 physiologically observed wave propagation pattern within the heart whereby the electrical signal  
163 first travels down the ventricular septum to the apex and then up the ventricular side walls.

164 Conduction velocity of the bundle branches were controlled to simulate electrophysiological  
165 asynchronies such as LBBB and RBBB (**Figure 2** and Supplemental Video 1) following the literature  
166 (Peirlinck et al. 2021). The conduction velocity of the one-dimensional electrical elements of the  
167 right bundle branch was reduced while simulating RBBB. Similarly, the conduction velocity of  
168 the left bundle branch was reduced simulating LBBB. Tissue responses were assumed to be  
169 unchanged.

## 170 2.2. Structural modeling

171 Structural modeling of the heart requires complex material models with the consideration of  
172 active material response governed by the electrical impulses, and viscoelastic behavior and local  
173 fiber orientation through the thickness of the heart wall to be able to simulate realistic cardiac  
174 motion. Accordingly, the structural heart was modeled using two types of anisotropic hyperelastic  
175 formulation based on that proposed by Holzapfel and Ogden (Holzapfel and Ogden 2009). The  
176 passive part of the stress tensor is solely governed by mechanical deformation, while the active  
177 part is generated by excitation-induced contraction of myocytes during the course of  
178 depolarization. The active stress in the cardiac muscle fiber direction is defined by a time varying  
179 elastance model (Walker et al. 2005).

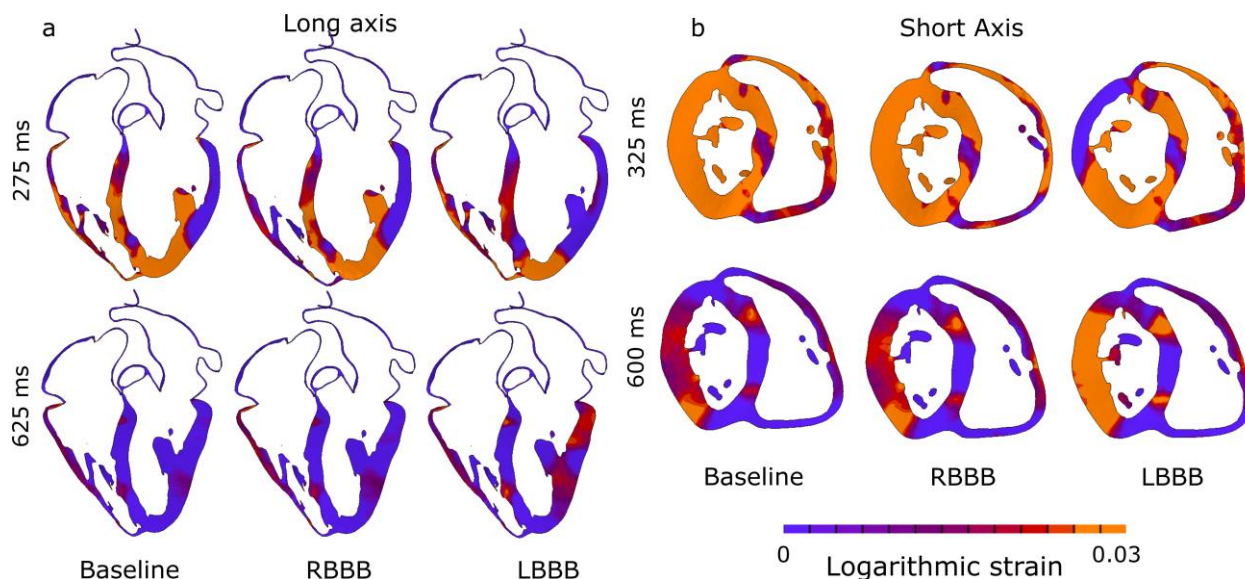

**Figure 3:** Logarithmic strain distribution for baseline, LBBB, and RBBB cases at 4 different time steps from long axis (left) and short axis (right) views.

180 The heart structure has a complex orientation as the fibers that make up the heart are not  
181 oriented in the same direction across the surface or through the thickness of the heart wall. To  
182 accurately represent the directional properties of the cardiac tissue, an anisotropic material model  
183 is employed, which necessitates assigning a local orientation to each element. The fiber angles in  
184 the ventricles are defined as approximately  $-60^\circ$  for the epicardium and  $+60^\circ$  for the endocardium  
185 following Streeter et al. (Streeter Jr et al. 1969). Further details can be found in the Simulia Living  
186 Heart manual. (*SIMULIA Living Heart Human Model User Guide* 2018)

### 187 2.3. Simulation parameters

188 The simulation was carried out in two stages (electrical and structural). In the first stage,  
189 cardiac conduction was simulated following the steps described in section 2.1. The electrical  
190 impulse results obtained from the electrical simulation was used as boundary conditions to  
191 simulate the realistic structural heart contraction in Abaqus Explicit 2019 solver (SIMULIA,  
192 Dassault Systèmes, Providence, RI). Preexisting LBBB and RBBB conditions (**Figure 3** and

193 Supplemental Video 2) were modeled using the electrical impulse results from the modified  
194 electrical simulations as described in section 2.1. The structural simulation was divided into 6 steps

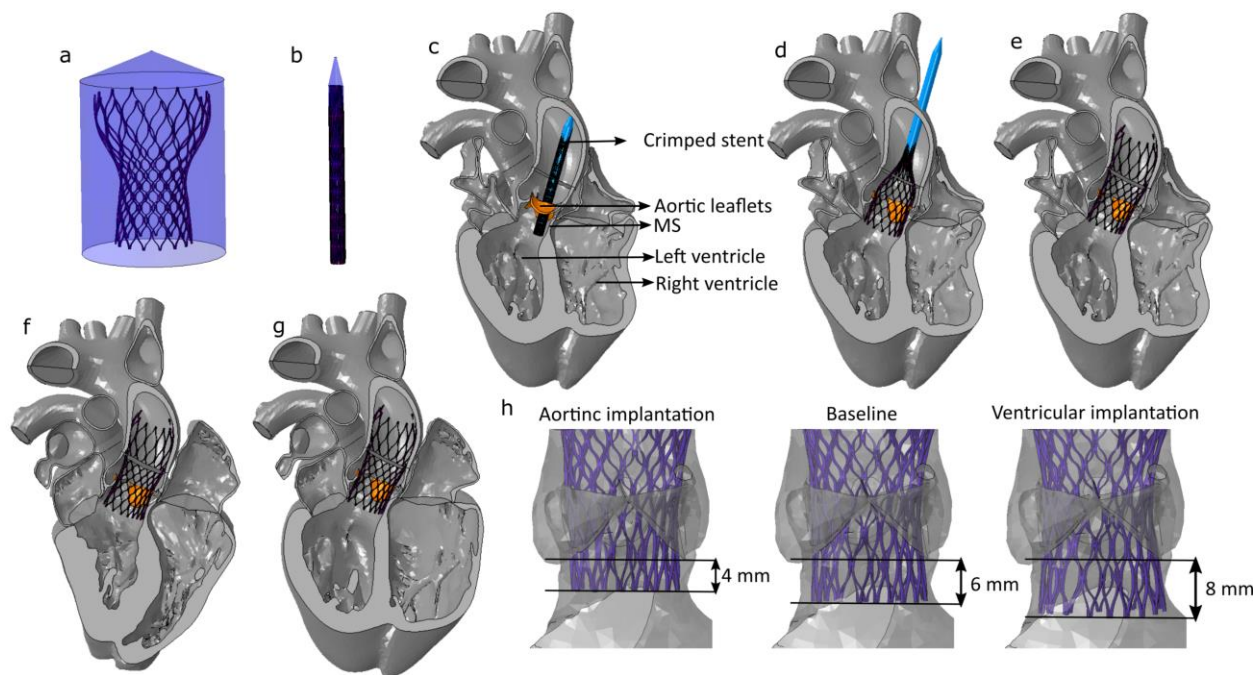

**Figure 4:** Illustration of the (a) uncrimped TAVR, (b) crimping, (c, d) implantation, (e) preload, (f) cardiac beat, and (g) relaxation steps. (h) Three considered implantation depths are also visualized.

195 including crimping, placement, deployment, preload, beat and recovery (**Figure 4** and Supplemental  
196 Video 3). Beat and recovery steps were repeated sequentially for two more cardiac cycles.

197 The TAVR stent was modeled and meshed using hexahedra-based structured mesh. A  
198 superelastic Nitinol alloy (14 constants user material VUMAT available in Abaqus) material  
199 model was employed (Morganti et al. 2016; Ghosh et al. 2020a; Oks et al. 2023) for the TAVR  
200 stent. Frictional hard contact with a friction coefficient of 0.7 (Rocatello et al. 2018) was used to  
201 model the interaction of the TAVR prosthesis with the native tissue. Contact-based interaction was  
202 defined between the TAVR prosthesis and the native tissue during the cardiac cycles that allowed  
203 the prosthesis to slide and reposition due to the cardiac motion.  $1e^{-07}$  Mass scaling was employed  
204 during the deployment stage of each model. During the cardiac cycles, the mass scaling was

205 calibrated to maintain a stable time increment  $>2.5e^{-06}$  seconds resulting in an initial added mass  
206 of 0.57%, substantially improving performance with minimal impact on results (*SIMULIA Living*  
207 *Heart Human Model User Guide* 2018).

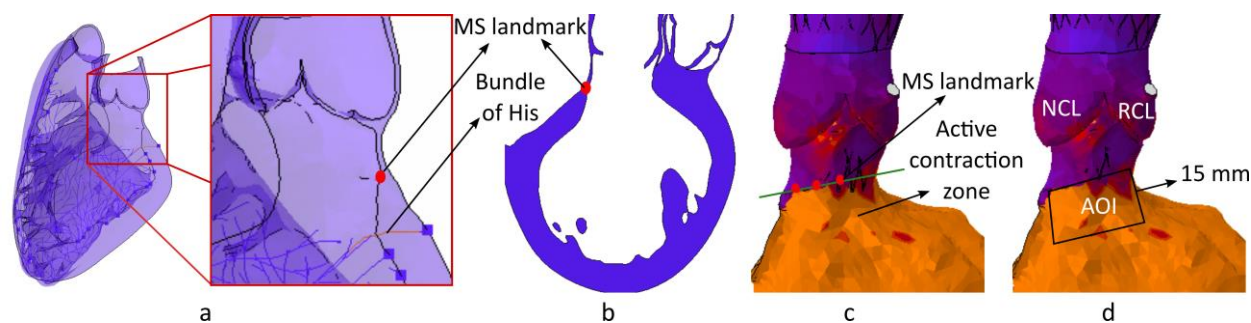

**Figure 5:** Illustration of the MS landmark from (a) isometric, and (b) long axis view. Identified MS landmark in shown in green (c) and identified area of interest is confined to a black box (d).

208 The His bundle (HB) is positioned in between the atrioventricular membranous septum and  
209 posterior crest of the muscular septum below the interleaflet triangle of non-coronary leaflet (NCL)  
210 and left-coronary leaflet (LCL) (Piazza et al. 2008). Therefore, the area of interest (AOI) was  
211 defined below the MS landmark in between NCL and LCL to perform analyses on the stresses and  
212 contact-based parameters associated with post-TAVR CCA (**Figure 5**), following the technique  
213 described in (Rocatello et al. 2018).

### 214 3. Results

215 TAVR prostheses were implanted inside the aortic annulus of the living heart model in three  
216 preexisting cardiac conduction scenarios (normal cardiac conduction, LBBB and RBBB) and three  
217 implantation depths (4mm, 6mm, and 8 mm). Three cardiac cycles were simulated following the  
218 TAVR deployment to analyze the interaction between the TAVR prosthesis and AOI. Initially, the  
219 stress components (axial, radial, and hoop stress) on the AOI were observed for each patient case  
220 and compared with the stress components on the AOI of a healthy heart case which is denoted as

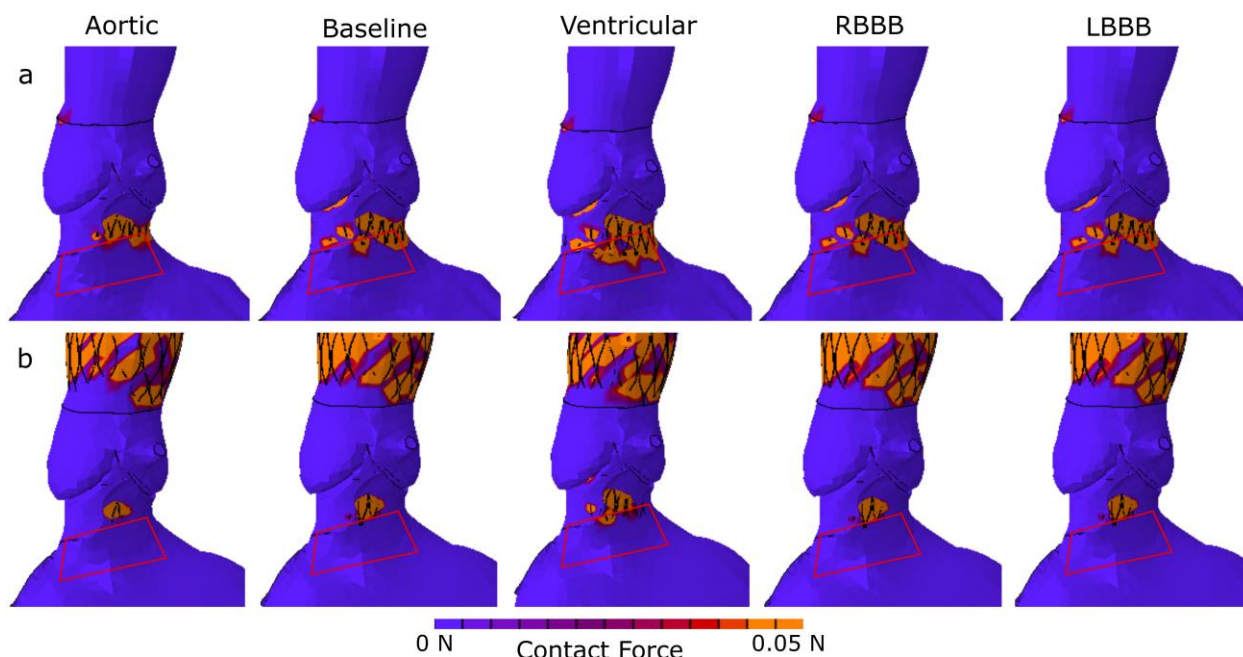

**Figure 6:** Contact force contour at the AOI during the (a) deployment stage, and (b) late beat stage. The red box depicts the AOI.

221 ‘No TAVR’. Contact force (**Figure 6**), contact pressure, contact pressure index (CPI) were also  
222 analyzed for each virtual patient case.

### 223 3.1. Impact of TAVR implantation on the AOI

224 The principal stress components on the AOI such as axial, radial, and hoop stresses for the  
225 ‘No TAVR’ case peak during the late systole of each cardiac cycle. **Figure 7a** shows that TAVR  
226 implantation increases all three stress components. The temporal sum of the stress components  
227 during peak systole was measured to account for both the magnitude and the duration of the peak  
228 (area under the peak stress component). For aortic implantation, there was a 78% increase in the  
229 temporal sum of peak axial stress, a 33% increase in radial stress, and a 10% increase in hoop  
230 stress. In the baseline implantation depth (ID), the temporal sum of peak axial stress increased by  
231 89%, radial stress by 36%, and hoop stress by 11%. For ventricular implantation, there was a 95%

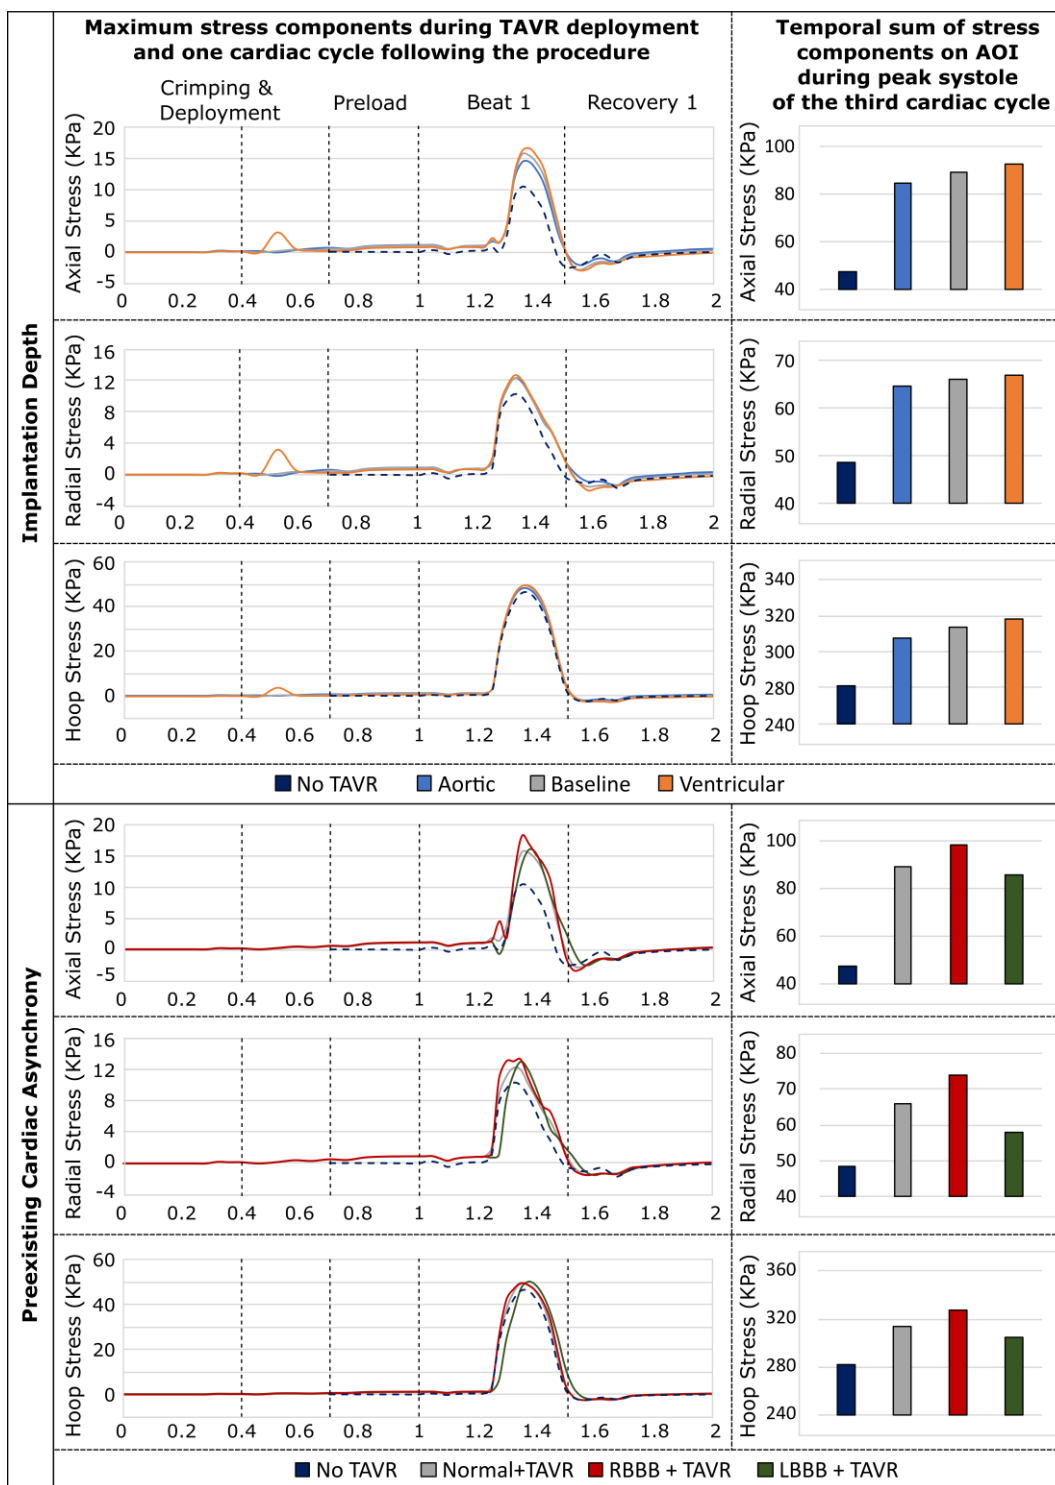

**Figure 7:** Maximum principal stress components during TAVR deployment and one cardiac cycle following the procedure (left), and the temporal sum of stress components on AOI during peak systole of the third cardiac cycle (right) for (a) three implantation depths, and (b) three cardiac conduction scenarios are compared to the healthy heart.



232 increase in the temporal sum of peak axial stress, a 38% increase in radial stress, and a 13%  
233 increase in hoop stress as illustrated in **Figure 7a**.

234 Stress components on the AOI in preexisting cardiac asynchrony cases (LBBB and RBBB)  
235 were also compared to the 'No TAVR' case. It was observed that the stress components peaked for  
236 a shorter duration in the LBBB case compared to the normal heartbeat case. In the preexisting  
237 RBBB case, there was a 10% increase in the temporal sum of peak axial stress, a 12% increase in  
238 radial stress, and a 5% increase in hoop stress. In contrast, the preexisting LBBB case showed a  
239 relatively smaller increase of 4% in the temporal sum of peak axial stress, 12% in radial stress, and  
240 3% in hoop stress (**Figure 7b**).

241 Contact-based parameters were also analyzed and compared for all five cases considered  
242 in the study. A large peak of maximum contact pressure was observed during the deployment step,  
243 which stabilized by the end of the deployment stage and during the preload. However, during the  
244 heartbeats following TAVR deployment, there was a fluctuation of contact pressure, with a peak  
245 of contact pressure observed from late beat to early recovery step for each cardiac cycle.

### 246 3.2. Implantation Depth Analysis

247 The Evolut® 26 mm device was implanted in three different depths (4 mm, 6mm, and 8mm)  
248 as described in section 2 Contact pressure, contact force, and contact area index were analyzed for  
249 these three implantation depths. The instantaneous contact pressure waveform on the AOI at each  
250 simulation step was compared and illustrated in **Figure 8a**. The contact pressure throughout the  
251 simulation was significantly lower for the aortic deployment and higher for the ventricular  
252 deployment compared to the baseline implantation (**Figure 8a, b** and Supplemental Video 4). The  
253 mean of the temporal maximum contact pressure and cumulative contact pressure were measured  
254 to be 0.13 KPa, and 17.87 KPa, respectively for aortic deployment, 2.12 KPa, and 298.32 KPa,

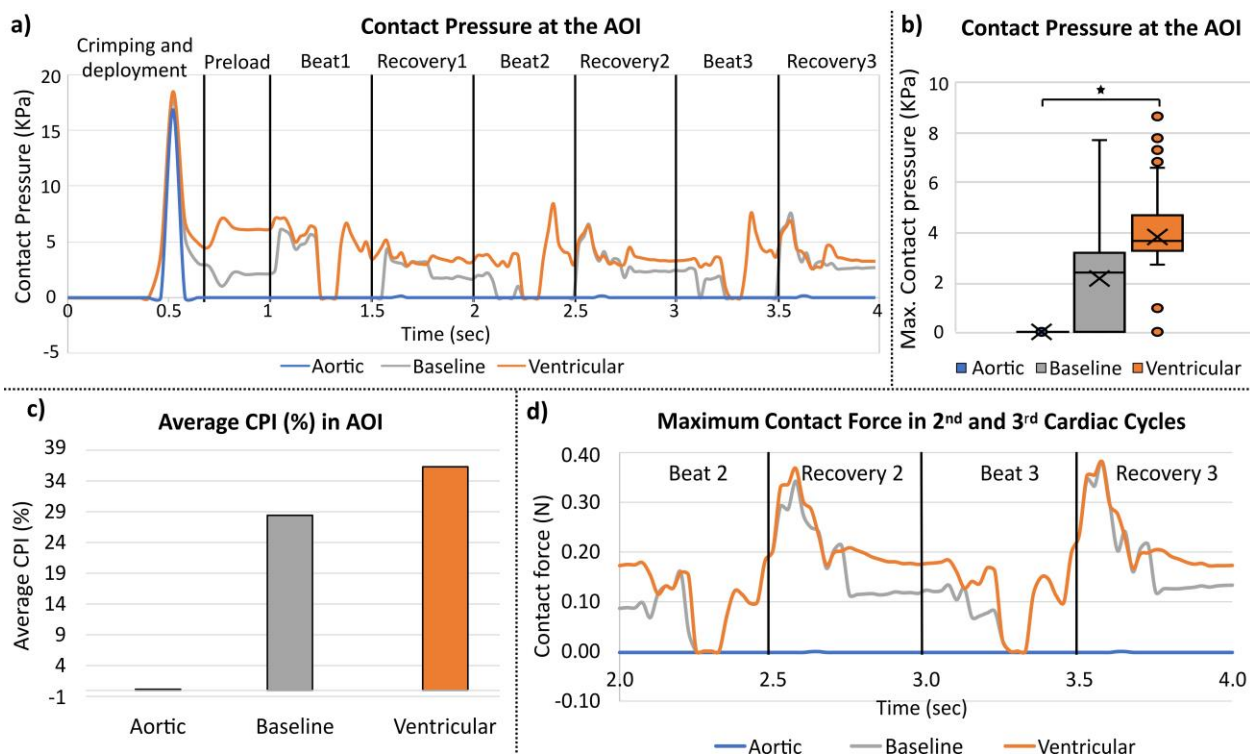

**Figure 8:** Effects of implantation depth (a) Contact pressure on the AOI at each step, (b) Box plot diagrams of contact pressure at the AOI during three cardiac cycles following TAVR implantation for three implantation depths. Kruskal-wallis test was performed between the three implantation depths yielding  $P < 0.001$ . (c) Average CPI during three cardiac cycles, and (d) maximum contact force during the 2<sup>nd</sup> and 3<sup>rd</sup> cardiac cycles for the three implantation depths.

255 respectively for baseline implantation, and 3.73 KPa, and 525.78 KPa respectively for ventricular  
256 deployment.

257 The temporal average of the contact pressure index (CPI) was measured to be 0.5%, 28%, and  
258 36% for aortic, baseline, and ventricular implantation respectively (**Figure 8c**). Maximum contact  
259 force during the cardiac cycles following the TAVR deployment was significantly higher for  
260 baseline implantation and ventricular implantation compared to aortic implantation and marginally  
261 higher for ventricular implantation compared to baseline implantation. Maximum contact force for  
262 aortic, baseline, and ventricular implantation depths were measured as 0.45 N, 2.34 N, and 2.18

263 N, respectively during the deployment and 0.0003 N, 0.37 N, and 0.38 N, respectively during the  
264 cardiac cycles following the TAVR deployment (**Figure 8d**).

### 265 3.3. Cardiac Asynchrony Analysis

266 Evolut<sup>®</sup> 26 mm prosthesis was deployed at a 6 mm implantation depth in preexisting LBBB  
267 and RBBB conditions to measure the effect of preexisting cardiac asynchrony on contact-based  
268 parameters. The results were then compared to the contact-based parameters measured at a normal  
269 heartbeat condition.

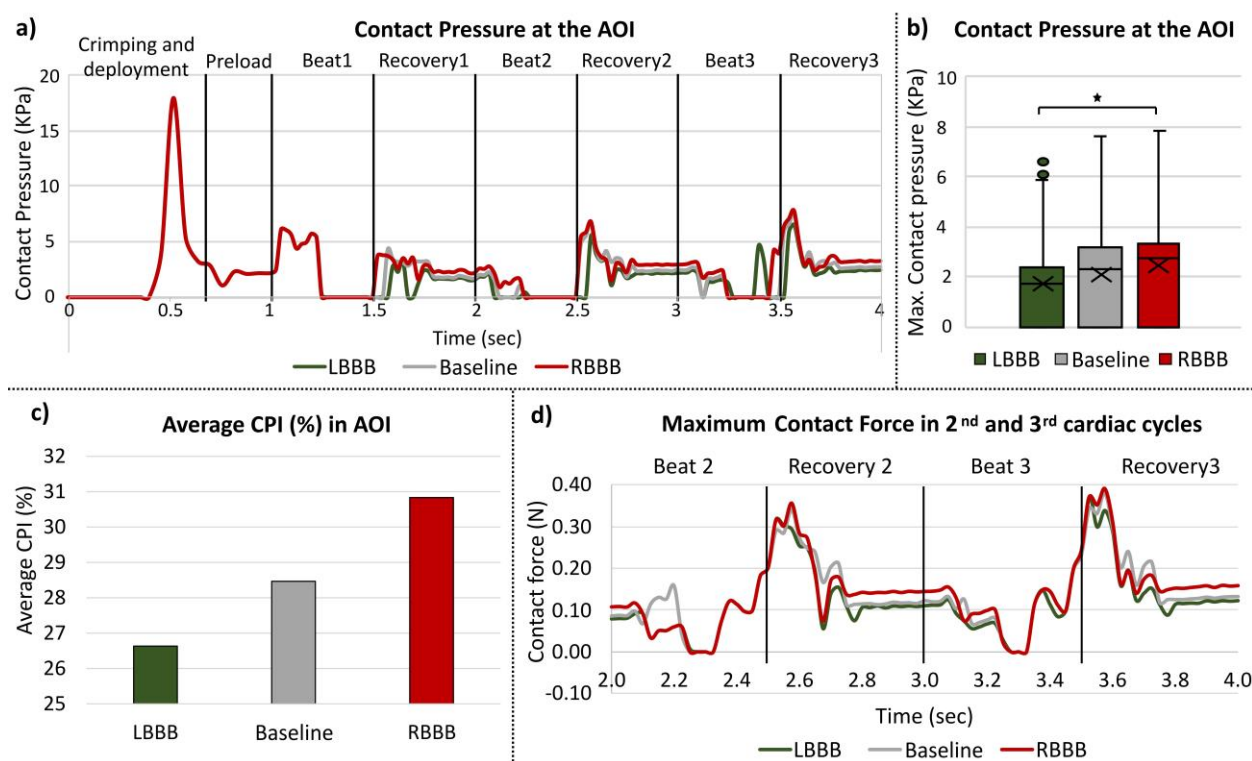

**Figure 9:** Effects of preexisting Cardiac Asynchrony (a) Contact pressure on the AOI at each step, (b) Box plot diagrams of contact pressure on the AOI during three cardiac cycles following TAVR implantation for three cardiac conduction scenarios. Kruskal-wallis test was performed between the three cardiac conduction scenarios yielding  $P < 0.001$ . (c) Average CPI during three cardiac cycles, and (d) maximum contact force during the 2<sup>nd</sup> and 3<sup>rd</sup> cardiac cycles for the three cardiac conduction scenarios.

270 The electrical impulse was measured at the free wall of the right ventricle for RBBB case and  
271 at the free wall of the left ventricle demonstrating the delay in the conduction of the electrical  
272 impulse (**Figure 2a, b**). The distribution of the electrical impulse during one beat is illustrated in  
273 **Figure 2c** for Normal heartbeat, LBBB and RBBB cases. The structural changes caused by the  
274 preexisting CCAs (RBBB and LBBB) are illustrated from long axis and short axis in **Figure 3**. The  
275 qualitative comparison demonstrated a delayed contraction of LV for the LBBB case and a delayed  
276 contraction of RV for the RBBB case. Moreover, preexisting LBBB demonstrated a 4.7 mm apex  
277 shift towards the left, and preexisting RBBB demonstrated a 3.7 mm apex shift towards the right.

278 The instantaneous contact pressure waveform on the AOI at each simulation step was  
279 compared and illustrated in **Figure 9a**. The contact pressure throughout the simulation was higher  
280 for the preexisting RBBB and lower for the preexisting LBBB compared to the normal conduction  
281 case (**Figure 9a, b**). Preexisting RBBB case has demonstrated a higher mean of the temporal  
282 maximum contact pressure, and cumulative contact pressure during 3 cardiac cycles following  
283 TAVR (2.4 Kpa, and 339.24 Kpa respectively) compared to the normal heartbeat (2.12 Kpa, and  
284 298.32 Kpa) and preexisting LBBB cases (1.78 Kpa, and 250.27 Kpa, respectively).

285 The temporary average of the contact pressure index (CPI) was measured to be 26%, 28%, and  
286 30% for LBBB, normal heartbeat, and RBBB cases, respectively (**Figure 9c**). Maximum contact  
287 force for LBBB, normal heartbeat, and RBBB cases were unchanged during the deployment stage.  
288 However, experienced different contact forces during the cardiac cycles following the TAVR  
289 deployment (0.37 N, 0.38 N, and 0.39 N, respectively) as shown in **Figure 9d**.

#### 290 4. Discussion

291 Post-TAVR cardiac conduction abnormalities (CCA) emerge as a significant post-  
292 procedural challenge that may necessitate permanent pacemaker implantation (PPI). The need for

293 PPI has been associated with increased mortality rates and heart failure-related hospitalizations  
294 that may hamper the overall success and expansion of TAVR technology. To address the risk of  
295 post-TAVR CCA, extensive clinical investigations have been undertaken, delving into various  
296 anatomical and procedural variables. Among these factors, implantation depth, Membranous  
297 septum (MS) length,  $\Delta$ MSID, and preexisting RBBB have emerged as prominently linked to post-  
298 TAVR CCA. Nevertheless, comprehending the intricate interplay between dynamic heart  
299 conditions, preexisting cardiac asynchrony, and the interaction between conduction fibers and the  
300 TAVR prosthesis remains a complex challenge. This study introduces a pioneering approach,  
301 employing a high-fidelity, electro-mechanically coupled beating heart model to unravel the  
302 mechanisms underpinning post-TAVR CCA and their intricate interrelation with anatomical and  
303 procedural factors.

304         The implantation depth holds clinical significance in relation to post-TAVR CCA. This  
305 parameter was chosen to elucidate mechanical changes stemming from differing implantation  
306 depths and to compare these observations with real-world clinical data. Utilizing the Evolut<sup>®</sup> 26  
307 mm self-expandable TAVR prosthesis, the research revealed increased stress components within  
308 the area of interest (AOI) following TAVR implantation compared to the baseline, healthy  
309 condition. Analyzing the contact-based parameters indicated that the peak contact pressure  
310 coincides with the deployment phase and stabilizes during successive cardiac cycles. Mean contact  
311 pressure at the AOI during each beat and recovery stage showed lower values for aortic  
312 deployment and higher values for ventricular deployment compared to baseline implantation.  
313 Additionally, maximum contact force and contact pressure index (CPI) exhibited similar trends of  
314 implantation depth-dependent variations. Interestingly, stress components and contact-based  
315 parameters peaked at distinct phases of the cardiac cycle, underscoring the value of dynamic heart

316 simulations in assessing the risk of post-TAVR CCAs. Synthesizing clinical evidence with prior  
317 *in-vivo* and *in-silico* studies, it's evident that structural dynamics of the heart and contact between  
318 the prosthesis and conduction fibers jointly contribute to conduction delays. This study also  
319 unveiled a consistent increase in both stress and contact-based parameters with deeper  
320 implantation, aligning with clinical observations.

321         Prior research has established a strong correlation between preexisting RBBB and post-  
322 TAVR CCAs. However, the mechanisms underlying this connection remain enigmatic. This study  
323 introduces preexisting cardiac asynchrony, encompassing both LBBB and RBBB, as a second  
324 parameter. The study investigates the interaction between the TAVR prosthesis and conduction  
325 fibers throughout deployment and cardiac cycles, considering the context of cardiac asynchrony.  
326 The results revealed delayed conduction and structural shifts due to preexisting LBBB and RBBB.  
327 LBBB led to delayed left ventricle (LV) contractions, while RBBB induced delayed contractions  
328 in the right ventricle (RV). These structural adaptations, combined with altered electrical impulse  
329 conduction, influenced contact-based parameters. Importantly, stress components on the AOI  
330 peaks were of shorter duration in the presence of preexisting LBBB compared to a scenario with  
331 a normal heartbeat (baseline case). In contrast, preexisting RBBB amplified the cumulative  
332 temporal peak stress components on the AOI. These findings underscore the impact of preexisting  
333 conduction irregularities on stress distribution following TAVR deployment. The structural  
334 alterations associated with RBBB introduce mechanical factors that heighten the risk of post-  
335 TAVR CCAs, reinforcing the need to consider preexisting conduction anomalies when assessing  
336 these risks.

337         Evaluating the possibility of early CCA and the likelihood of PPI is of substantial clinical  
338 significance. Analysis of the stresses exerted on the AOI clearly indicates that it leads to a distinct

339 surge in contact pressure and force during the TAVR deployment phase. This illustrates how the  
340 risk of a new onset of perioperative left bundle branch block (NOP-LBBB) may arise following  
341 TAVR. However, an upward shift in the contact area occurred during the successive cardiac cycles,  
342 subsequently resulting in nearly zero contact pressure experienced by the AOI which suggests that  
343 for this specific patient, a rapid cardiac adaptation occurred that may not require PPI. Baseline and  
344 ventricular implantation on the other hand demonstrated a reduced yet steady and cyclic contact  
345 pressure during the cardiac cycles. Previously, cyclic stretches on the Purkinje fibers were found  
346 to cause conduction delay which indicates that steady and cyclic contact pressure can cause  
347 stretches on the conduction fibers leading to conduction delay. This observation may provide  
348 insights into the recovery of perioperative CCA and delayed complete AV-block following TAVR.  
349 Moreover, by integrating patient-specific electrophysiological conditions and analyzing  
350 mechanical parameters during cardiac cycles post-TAVR deployment, it might be feasible to  
351 predict which patients will recover from early CCA and thereby evade unnecessary PPI. Such an  
352 approach could potentially reduce costs and hospital stays linked to unnecessary interventions.

353 While static models have been employed for rapid CCA risk assessments and have  
354 demonstrated some consistency with clinical findings, they lack the inherent dynamics of a  
355 pulsating heart and do not account for preexisting conduction issues. Dynamic models, on the other  
356 hand, provide the opportunity for a more physiologically realistic analysis of the emergence of  
357 CCAs by considering patient-specific electrophysiological conditions and cardiac cycles. The  
358 analysis revealed that the stent frame exerts the highest contact pressure at the early recovery phase  
359 of a cardiac cycle. Therefore, reconstructing the patient model at this stage might enable the  
360 capture of a snapshot depicting the maximum contact pressure during a cardiac cycle using a static

361 model instead of a dynamic one. This has the potential to improve the assessment of post-TAVR  
362 CCA risk, even when utilizing static models.

363 In summary, dynamic models point out the importance of implantation depth, cardiac  
364 asynchrony, and the heart's dynamics in post-TAVR CCA risk evaluation. The results revealed  
365 that the risk of post-TAVR CCA increases with deeper implantation depth, and preexisting RBBB  
366 causes increased stresses and contact pressure for a longer period of time enhancing the risk of  
367 post-TAVR CCA. Consequently, a cautious approach is recommended when selecting a TAVR  
368 device for patients with preexisting RBBB. The presence of preexisting LBBB on the other hand  
369 resulted in decreased stresses and contact pressure on the AOI, indicating a reduced likelihood of  
370 additional conduction disturbances which is aligned with clinical studies (Maier et al. 2021). The  
371 innovative framework presented here has the potential to enhance preprocedural planning and  
372 contribute to the development of new TAVR devices, aiming to mitigate the risk of post-TAVR  
373 CCA and ultimately enhance patient outcomes.

## 374 5. Limitations

375 The Living Heart Model used for electro-mechanical coupling in this study was unidirectional,  
376 excluding the potential for mechano-electrical feedback. Nevertheless, a recent study has  
377 demonstrated that such exclusion induces only a slight change in conduction velocity (Costabal et  
378 al. 2017). This suggests that the one-way electro-mechanical coupling is a reasonable  
379 approximation for evaluating post-procedural cardiovascular device risks. This study serves as a  
380 methodological approach where a standard Living Heart Model of a healthy heart of a 26-year-old  
381 male was used, that can then be manipulated to include various clinical scenarios- such as the  
382 TAVR induced CCAs presented in this study, and preexisting conditions such as LBBB and RBBB  
383 cases. The use of patient-specific beating heart models is necessary to establish a threshold of the



384 analyzed mechanical parameters that enables to distinguish between patients who may or may not  
385 develop a new conduction abnormality following a TAVR procedure. We plan to expand our  
386 current simulations to incorporate patient-specific features such as the aortic root and aortic valve  
387 calcifications in the future.

## 388 6. Conclusions

389 In this study, a novel computational technique is employed to understand the interaction  
390 between the TAVR prosthesis and the conduction fibers leading to the assessment of post-TAVR  
391 CCA risk in different procedural and electro-mechanical scenarios. The study indicated that a  
392 deeper implantation location and a preexisting RBBB causes higher stresses and contact pressure  
393 on the conduction fibers and the A-V node, leading to increased risk of post-TAVR CCA. The  
394 analysis indicates that implantation above the A-V node MS landmark yielding a negative  $\Delta$ MSID,  
395 reduces the CCA risk and the potential need of post-procedural PPI. Our study also indicates that  
396 a conservative approach needs to be considered when choosing a TAVR device for patients with  
397 a preexisting RBBB since these patients may experience enhanced stresses and contact pressure  
398 due to the dynamic modifications caused by the device deployment and its interaction with the  
399 RBBB. This method, employing a systematic digital twin approach, offers potential for  
400 personalized preprocedural planning under conditions that simulate a realistically beating heart,  
401 aiming to enhance patient outcomes. Additionally, it can be applied to the development of  
402 innovative TAVR devices designed to reduce the risk of post-TAVR cardiac conduction  
403 abnormalities (CCA).

## 404 Acknowledgement

405 SIMULIA Living Heart Project has provided the base framework of 4-chamber beating  
406 heart model employed in this study. The authors thank Dr. Matteo Bianchi for initiating the project  
407 and providing scientific insights.

#### 408 Funding Source

409 This project is funded by NIH-NIBIB BRP U01EB026414 (DB)

410

#### 411 Reference:

412 Alperi, Alberto, Josep Rodes-Cabau, Matheus Simonato, Didier Tchetché, Gaetan Charbonnier,

413 Henrique B Ribeiro, Azeem Latib, Matteo Montorfano, Marco Barbanti, and Sabine

414 Bleiziffer. 2021. 'Permanent pacemaker implantation following valve-in-valve

415 transcatheter aortic valve replacement: VIVID registry', *J Am Coll Cardiol*, 77: 2263-73.

416 Baillargeon, Brian, Nuno Rebelo, David D Fox, Robert L Taylor, and Ellen Kuhl. 2014. 'The

417 living heart project: a robust and integrative simulator for human heart function', *European*

418 *Journal of Mechanics-A/Solids*, 48: 38-47.

419 Boonyakiatwattana, Wongsaput, Adisak Maneesai, Vithaya Chaithiraphan, Decho

420 Jakrapanichakul, Pranya Sakiyalak, Narathip Chunhamaneewat, Worawong Slisatkorn,

421 Chunchakasem Chotinaiwattarakul, Rungtiwa Pongakasira, and Nattawut Wongpraparut.

422 2022. 'Preprocedural and procedural variables that predict new-onset conduction

423 disturbances after transcatheter aortic valve replacement', *BMC Cardiovasc Disord*, 22:

424 135.

425 Bordas, Rafel Mark, Kathryn Gillow, David Gavaghan, Blanca Rodríguez, and David Kay. 2012.

426 'A bidomain model of the ventricular specialized conduction system of the heart', *SIAM*

427 *Journal on Applied Mathematics*, 72: 1618-43.

- 428 Breitbart, Philipp, Jan Minners, Manuel Hein, Holger Schröfel, Franz-Josef Neumann, and Philipp  
429 Ruile. 2021. 'Implantation depth and its influence on complications after TAVI with self-  
430 expanding valves', *Int J Cardiovasc Imaging*, 37: 3081-92.
- 431 Canale, E, GR Campbell, Y Uehara, T Fujiwara, and JJ Smolich. 1983. 'Sheep cardiac Purkinje  
432 fibers: Configurational changes during the cardiac cycle', *J Cell and tissue research*, 232:  
433 97-110.
- 434 Chen, R, DJ Penny, G Greve, and MJ Lab. 2004. 'Rate dependence of mechanically induced  
435 electrophysiological changes in right ventricle of anaesthetized lambs during pulmonary  
436 artery occlusion', *Acta physiologica scandinavica*, 180: 13-19.
- 437 Costabal, F Sahli, JS Choy, Kevin L Sack, Julius M Guccione, GS Kassab, and Ellen Kuhl. 2019.  
438 'Multiscale characterization of heart failure', *Acta Biomaterialia*, 86: 66-76.
- 439 Costabal, Francisco Sahli, Felipe A Concha, Daniel E Hurtado, and Ellen Kuhl. 2017. 'The  
440 importance of mechano-electrical feedback and inertia in cardiac electromechanics',  
441 *Computer Methods in Applied Mechanics and Engineering*, 320: 352-68.
- 442 Costabal, Francisco Sahli, Daniel E Hurtado, and Ellen Kuhl. 2016. 'Generating Purkinje networks  
443 in the human heart', *J Biomech*, 49: 2455-65.
- 444 Costabal, Francisco Sahli, Kristen Matsuno, Jiang Yao, Paris Perdikaris, and Ellen Kuhl. 2019.  
445 'Machine learning in drug development: characterizing the effect of 30 drugs on the QT  
446 interval using Gaussian process regression, sensitivity analysis, and uncertainty  
447 quantification', *Computer Methods in Applied Mechanics*, 348: 313-33.
- 448 Faroux, L., S. Chen, G. Muntane-Carol, A. Regueiro, F. Philippon, L. Sondergaard, T. H.  
449 Jorgensen, J. Lopez-Aguilera, S. Kodali, M. Leon, T. Nazif, and J. Rodes-Cabau. 2020.

450 'Clinical impact of conduction disturbances in transcatheter aortic valve replacement  
451 recipients: a systematic review and meta-analysis', *Eur Heart J*, 41: 2771-81.

452 Ferrier, GREGORY R. 1976. 'The effects of tension on acetylcholinesterase-induced transient  
453 depolarizations and aftercontractions in canine myocardial and Purkinje tissues', *Circ Res*,  
454 38: 156-62.

455 Franz, Michael R, Robert Cima, Dale Wang, D Profitt, and Robert Kurz. 1992.  
456 'Electrophysiological effects of myocardial stretch and mechanical determinants of stretch-  
457 activated arrhythmias', *Circulation Journal*, 86: 968-78.

458 Fujita, Buntaro, Maximilian Kütting, Moritz Seiffert, Smita Scholtz, Sandrine Egron, Emir  
459 Prashovikj, Jochen Börgermann, Timm Schäfer, Werner Scholtz, Rainer Preuss, Jan  
460 Gummert, Ulrich Steinseifer, and Stephan M. Ensminger. 2016. 'Calcium distribution  
461 patterns of the aortic valve as a risk factor for the need of permanent pacemaker  
462 implantation after transcatheter aortic valve implantation', *European Heart Journal -  
463 Cardiovascular Imaging*.

464 Galili, Lee, Adi White Zeira, and Gil Marom. 2022. 'Numerical biomechanics modelling of  
465 indirect mitral annuloplasty treatments for functional mitral regurgitation', *Royal Society  
466 Open Science*, 9: 211464.

467 Genet, Martin, Lik Chuan Lee, Brian Baillargeon, Julius M Guccione, and Ellen Kuhl. 2016.  
468 'Modeling pathologies of diastolic and systolic heart failure', *Ann Biomed Eng*, 44: 112-27.

469 Ghosh, R. P., G. Marom, M. Bianchi, K. D'Souza, W. Zietak, and D. Bluestein. 2020a. 'Numerical  
470 evaluation of transcatheter aortic valve performance during heart beating and its post-  
471 deployment fluid-structure interaction analysis', *Biomech Model Mechanobiol*, 19: 1725-  
472 40.

- 473 Ghosh, Ram P., Gil Marom, Matteo Bianchi, Karl D'Souza, Wojtek Zietak, and Danny Bluestein.  
474 2020b. 'Numerical evaluation of transcatheter aortic valve performance during heart  
475 beating and its post-deployment fluid--structure interaction analysis', *Biomech Model*  
476 *Mechanobiol*, 19: 1725-40.
- 477 Hamdan, Ashraf, Victor Guetta, Robert Klempfner, Eli Konen, Ehud Raanani, Michael Glikson,  
478 Orly Goitein, Amit Segev, Israel Barbash, Paul Fefer, Dan Spiegelstein, Ilan Goldenberg,  
479 and Ehud Schwammenthal. 2015. 'Inverse Relationship Between Membranous Septal  
480 Length and the Risk of Atrioventricular Block in Patients Undergoing Transcatheter  
481 Aortic Valve Implantation', *JACC: Cardiovascular Interventions*, 8: 1218-28.
- 482 Heidari, Alireza, Khalil I Elkhodary, Cristina Pop, Mohamed Badran, Hojatollah Vali, Yousof MA  
483 Abdel-Raouf, Saeed Torbati, Masoud Asgharian, Russell J Steele, and Iradj  
484 Mahmoudzadeh Kani. 2022. 'Patient-specific finite element analysis of heart failure and  
485 the impact of surgical intervention in pulmonary hypertension secondary to mitral valve  
486 disease', *Medical biological engineering computing*, 60: 1723-44.
- 487 Holzapfel, Gerhard A, and Ray Ogden. 2009. 'Constitutive modelling of passive myocardium: a  
488 structurally based framework for material characterization', *Philosophical Transactions of*  
489 *the Royal Society A: Mathematical, Physical Engineering Sciences*, 367: 3445-75.
- 490 Hurley, Miriam, Sarbjot Kaur, Richard Walton, Amelia Power, Michel Haïssaguerre, Olivier  
491 Bernus, Marie-Louise Ward, and Ed White. 2023. 'Endocardial role in arrhythmias induced  
492 by acute ventricular stretch and the involvement of Purkinje fibres, in isolated rat hearts',  
493 *Current Research in Physiology*, 6: 100098.

- 494 Hurtado, Daniel E, and Ellen Kuhl. 2014. 'Computational modelling of electrocardiograms:  
495 repolarisation and T-wave polarity in the human heart', *Computer methods in biomechanics*  
496 *biomedical engineering*, 17: 986-96.
- 497 Jørgensen, Troels H, Ole De Backer, Thomas A Gerds, Gintautas Bieliauskas, Jesper H Svendsen,  
498 and Lars Søndergaard. 2019. 'Mortality and heart failure hospitalization in patients with  
499 conduction abnormalities after transcatheter aortic valve replacement', *JACC:*  
500 *Cardiovascular Interventions*, 12: 52-61.
- 501 Kim, D. Y., E. White, and D. A. Saint. 2012. 'Increased mechanically-induced ectopy in the  
502 hypertrophied heart', *Prog Biophys Mol Biol*, 110: 331-9.
- 503 Kotikanyadanam, Mohan, SERDAR Göktepe, and E. Kuhl. 2010. 'Computational modeling of  
504 electrocardiograms: A finite element approach toward cardiac excitation', *International*  
505 *Journal for Numerical Methods in Biomedical Engineering*, 26: 524-33.
- 506 Levine, JOSEPH H, THOMAS Guarnieri, ALAN H Kadish, ROBERT I White, HUGH Calkins,  
507 and JS Kan. 1988. 'Changes in myocardial repolarization in patients undergoing balloon  
508 valvuloplasty for congenital pulmonary stenosis: evidence for contraction-excitation  
509 feedback in humans', *Circulation Journal*, 77: 70-77.
- 510 Maeno, Yoshio, Yigal Abramowitz, Hiroyuki Kawamori, Yoshio Kazuno, Shunsuke Kubo,  
511 Nobuyuki Takahashi, Geeteshwar Mangat, Kazuaki Okuyama, Mohammad Kashif, and  
512 Tarun Chakravarty. 2017. 'A highly predictive risk model for pacemaker implantation after  
513 TAVR', *JACC: Cardiovascular Imaging*, 10: 1139-47.
- 514 Maier, Oliver, Kerstin Piayda, Shazia Afzal, Amin Polzin, Ralf Westenfeld, Christian Jung, Tobias  
515 Zeus, Gerald Antoch, Malte Kelm, and Verena Veulemans. 2021. 'Computed tomography  
516 derived predictors of permanent pacemaker implantation after transcatheter aortic valve

517 replacement: A meta-analysis', *Catheterization and Cardiovascular Interventions*, 98:  
518 E897-E907.

519 Maille, Baptiste, Marine Bouchat, Nicolas Dognin, Pierre Deharo, Noémie Ressayguier, Frédéric  
520 Franceschi, Linda Koutbi-Franceschi, Jérôme Hourdain, Elisa Martinez, and Maxime  
521 Zabern. 2022. 'Advantages and disadvantages of drug challenge during  
522 electrophysiological study in patients with new left bundle branch block after transaortic  
523 valve implantation', *IJC Heart Vasculature*, 39: 100961.

524 Mauri, Victor, Andreas Reimann, Daniel Stern, Maximilian Scherner, Elmar Kuhn, Volker  
525 Rudolph, Stephan Rosenkranz, Kaveh Eghbalzadeh, Kai Friedrichs, and Thorsten  
526 Wahlers. 2016. 'Predictors of permanent pacemaker implantation after transcatheter aortic  
527 valve replacement with the SAPIEN 3', *JACC: Cardiovascular Interventions*, 9: 2200-09.

528 Miyashita, Hirokazu, Noriaki Moriyama, Yoichi Sugiyama, Mikko Jalanko, Sebastian Dahlbacka,  
529 Tommi Vähäsilta, Tiina Vainikka, Juho Viikilä, and Mika Laine. 2023. 'Conduction  
530 Disturbance After Transcatheter Aortic Valve Implantation With Self-or Balloon-  
531 Expandable Valve According to the Implantation Depth', *Am J Cardiol*, 203: 17-22.

532 Morganti, S, N Brambilla, AS Petronio, A Reali, F Bedogni, and F Auricchio. 2016. 'Prediction  
533 of patient-specific post-operative outcomes of TAVI procedure: The impact of the  
534 positioning strategy on valve performance', *Journal of biomechanics*, 49: 2513-19.

535 Oestreich, Brett A, Mackenzie Mbai, Sergey Gurevich, Prabhjot S Nijjar, Selcuk Adabag, Stefan  
536 Bertog, Rosemary Kelly, and Santiago Garcia. 2018. 'Computed tomography (CT)  
537 assessment of the membranous septal anatomy prior to transcatheter aortic valve  
538 replacement (TAVR) with the balloon-expandable SAPIEN 3 valve', *Cardiovascular*  
539 *Revascularization Medicine*, 19: 626-31.

- 540 Oks, David, Symon Reza, Mariano Vázquez, Guillaume Houzeaux, Brandon Kovarovic, Cristóbal  
541 Samaniego, and Danny Bluestein. 2023. 'Effect of Sinotubular Junction Size on TAVR  
542 Leaflet Thrombosis: A Fluid–Structure Interaction Analysis', *Ann Biomed Eng*: 1-15.
- 543 Pasta, Salvatore, Chiara Catalano, Stefano Cannata, Julius M Guccione, and Caterina Gandolfo.  
544 2022. 'Numerical simulation of transcatheter mitral valve replacement: The dynamic  
545 implication of LVOT obstruction in the valve-in-ring case', *J Biomech*, 144: 111337.
- 546 Peirlinck, M, F Sahli Costabal, J Yao, JM Guccione, S Tripathy, Y Wang, D Ozturk, P Segars, TM  
547 Morrison, and S Levine. 2021. 'Precision medicine in human heart modeling', *Biomech*  
548 *Model Mechanobiol*, 20: 803-31.
- 549 Piazza, Nicolás, Peter de Jaegere, Carl Schultz, Anton E Becker, Patrick W Serruys, and Robert H  
550 Anderson. 2008. 'Anatomy of the aortic valvar complex and its implications for  
551 transcatheter implantation of the aortic valve', *Circulation: Cardiovascular Interventions*,  
552 1: 74-81.
- 553 Pollari, Francesco, Irena Großmann, Ferdinand Vogt, Jurij Matija Kalisnik, Michela Cuomo,  
554 Johannes Schwab, Theodor Fischlein, and Steffen Pfeiffer. 2019. 'Risk factors for  
555 atrioventricular block after transcatheter aortic valve implantation: a single-centre analysis  
556 including assessment of aortic calcifications and follow-up', *EP Europace*, 21: 787-95.
- 557 Quinn, T Alexander, and Peter %J Progress in biophysics Kohl. 2016. 'Rabbit models of cardiac  
558 mechano-electric and mechano-mechanical coupling', *Progress in biophysics molecular*  
559 *biology*, 121: 110-22.
- 560 Ravaux, Justine M, Michele Di Mauro, Kevin Vernooij, Silvia Mariani, Daniele Ronco, Jorik  
561 Simons, Arnoud W Van't Hof, Leo Veenstra, Suzanne Kats, and Jos G Maessen. 2021.



562 'Impact of Bundle Branch Block on Permanent Pacemaker Implantation after Transcatheter  
563 Aortic Valve Implantation: A Meta-Analysis', *Journal of clinical medicine*, 10: 2719.

564 Regueiro, Ander, Omar Abdul-Jawad Altisent, María Del Trigo, Francisco Campelo-Parada, Rishi  
565 Puri, Marina Urena, François Philippon, and Josep Rodés-Cabau. 2016. 'Impact of new-  
566 onset left bundle branch block and periprocedural permanent pacemaker implantation on  
567 clinical outcomes in patients undergoing transcatheter aortic valve replacement: a  
568 systematic review and meta-analysis', *Circulation: Cardiovascular Interventions*, 9:  
569 e003635.

570 Reynolds, AK, JF Chiz, and TK Tanikella. 1975. 'On the mechanism of coupling in adrenaline-  
571 induced bigeminy in sensitized hearts', *Canadian Journal of Physiology Pharmacology*,  
572 53: 1158-71.

573 Reza, Symon, Matteo Bianchi, Brandon Kovarovic, Salwa Anam, Marvin J Slepian, Ashraf  
574 Hamdan, Rami Haj-Ali, and Danny Bluestein. 2022. 'A computational framework for post-  
575 TAVR cardiac conduction abnormality (CCA) risk assessment in patient-specific  
576 anatomy', *Artif Organs*.

577 Rocatello, Giorgia, Nahid El Faquir, Gianluca De Santis, Francesco Iannaccone, Johan Bosmans,  
578 Ole De Backer, Lars Sondergaard, Patrick Segers, Matthieu De Beule, and Peter de  
579 Jaegere. 2018. 'Patient-specific computer simulation to elucidate the role of contact  
580 pressure in the development of new conduction abnormalities after catheter-based  
581 implantation of a self-expanding aortic valve', *Circulation: Cardiovascular Interventions*,  
582 11: e005344.

583 Sahli Costabal, Francisco, Jiang Yao, and Ellen Kuhl. 2018. 'Predicting drug-induced arrhythmias  
584 by multiscale modeling', *International Journal for Numerical Methods in Biomedical*  
585 *Engineering*, 34: e2964.

586 Schaefer, Andreas, Niklas Neumann, Matthias Linder, Niklas Schofer, Yvonne Schneeberger,  
587 Florian Deuschl, Gerhard Schoen, Stefan Blankenberg, Hermann Reichenspurner, and  
588 Lenard Conradi. 2018. 'Outcomes with a latest generation self-expandable, intra-annular,  
589 re-sheathable transcatheter heart valve system: analysis of patients with impaired left  
590 ventricular function and determinants for pacemaker implantation', *Clinical Research in*  
591 *Cardiology*, 107: 914-23.

592 *SIMULIA Living Heart Human Model User Guide*. 2018. (Dassault Systèmes Simulia Corp:  
593 United States).

594 St Pierre, Sarah R, Mathias Peirlinck, and Ellen Kuhl. 2022. 'Sex matters: a comprehensive  
595 comparison of female and male hearts', *Frontiers in Physiology*, 13: 831179.

596 Streeter Jr, Daniel D, Henry M Spotnitz, Dali P Patel, John Ross Jr, and Edmund H Sonnenblick.  
597 1969. 'Fiber orientation in the canine left ventricle during diastole and systole', *Circ Res*,  
598 24: 339-47.

599 Thakur, Ranjan K, George J Klein, Chittur A Sivaram, Marco Zardini, David E Schleinkofer,  
600 Hiroshi Nakagawa, Raymond Yee, and Warren M Jackman. 1996. 'Anatomic substrate for  
601 idiopathic left ventricular tachycardia', *J Circulation*, 93: 497-501.

602 Tretter, Justin T, Shumpei Mori, Robert H Anderson, Michael D Taylor, Nicholas Ollberding,  
603 Vien Truong, Joseph Choo, Dean Kereiakes, and Wojciech Mazur. 2019. 'Anatomical  
604 predictors of conduction damage after transcatheter implantation of the aortic valve', *Open*  
605 *heart*, 6: e000972.

- 606 Walker, Joseph C, Mark B Ratcliffe, Peng Zhang, Arthur W Wallace, Bahar Fata, Edward W Hsu,  
607 David Saloner, and Julius M %J American Journal of Physiology-Heart Guccione. 2005.  
608 'MRI-based finite-element analysis of left ventricular aneurysm', *American Journal of*  
609 *Physiology-Heart Circulatory Physiology*, 289: H692-H700.
- 610 Wisneski, Andrew D, Yunjie Wang, Tobias Deuse, Arthur C Hill, Salvatore Pasta, Kevin L Sack,  
611 Jiang Yao, and Julius M Guccione. 2020. 'Impact of aortic stenosis on myofiber stress:  
612 Translational application of left ventricle-aortic coupling simulation', *Frontiers in*  
613 *Physiology*: 1157.
- 614 Zheng, Hua-Jie, Chao-Jun Yan, De-Qing Lin, Yong-Bo Cheng, San-Jiu Yu, Jun Li, Xian-Pu  
615 Zhang, and Wei Cheng. 2023. 'Prognostic impact of new permanent pacemaker  
616 implantation following transcatheter aortic valve replacement', *Catheterization*  
617 *Cardiovascular Interventions*.
